# Supplementary material for: Huaier Polysaccharides Targets Cancer Stem Cells in Triple-Negative Breast Cancer via ASM-mediated Autophagy-dependent Ferroptosis
Source: Research Square preprint supplement (doi:10.21203/rs.3.rs-5706155/v1), 2024-12-30
Supplement: Supplementary file 1 [file 226a779b74055a952a3ec537.xlsx]

## Sheet: Sheet1
	Table S1. The sequences and lengths of the PCR primers.
	Oligo Name	Sequence (5' to 3')	Length
	POU5F1 F	cca ttt tgg tac ccc agg ct	20
	POU5F1 R	gag aca ggg gga aag gct tc	20
	SOX2 F	ggc aat agc atg gcg agc	18
	SOX2 R	ttc atg tgc gcg taa ctg tc	20
	NAONG F	atg gtg tga cgc agg gat g	19
	NAONG R	tgg ttg ctc cag gtt gaa ttg	21
	GPX4 F	tga aga tcc aac cca agg gc	20
	GPX4 R	gtg gag aga cgg tgt cca aa	20
	SMPD1 F	tcc tgg tta ccg tgt gta cc	20
	SMPD1 R	gcc tgg gtc aga ttc agg at	20
