# Supplementary material for: Huaier Polysaccharides Targets Cancer Stem Cells in Triple-Negative Breast Cancer via ASM-mediated Autophagy-dependent Ferroptosis
Source: Research Square preprint supplement (doi:10.21203/rs.3.rs-5706155/v1), 2024-12-30
Supplement: Supplementary file 2 [file 88f74760fe453d6fbe1f6837.docx]

# Supplementary Figures


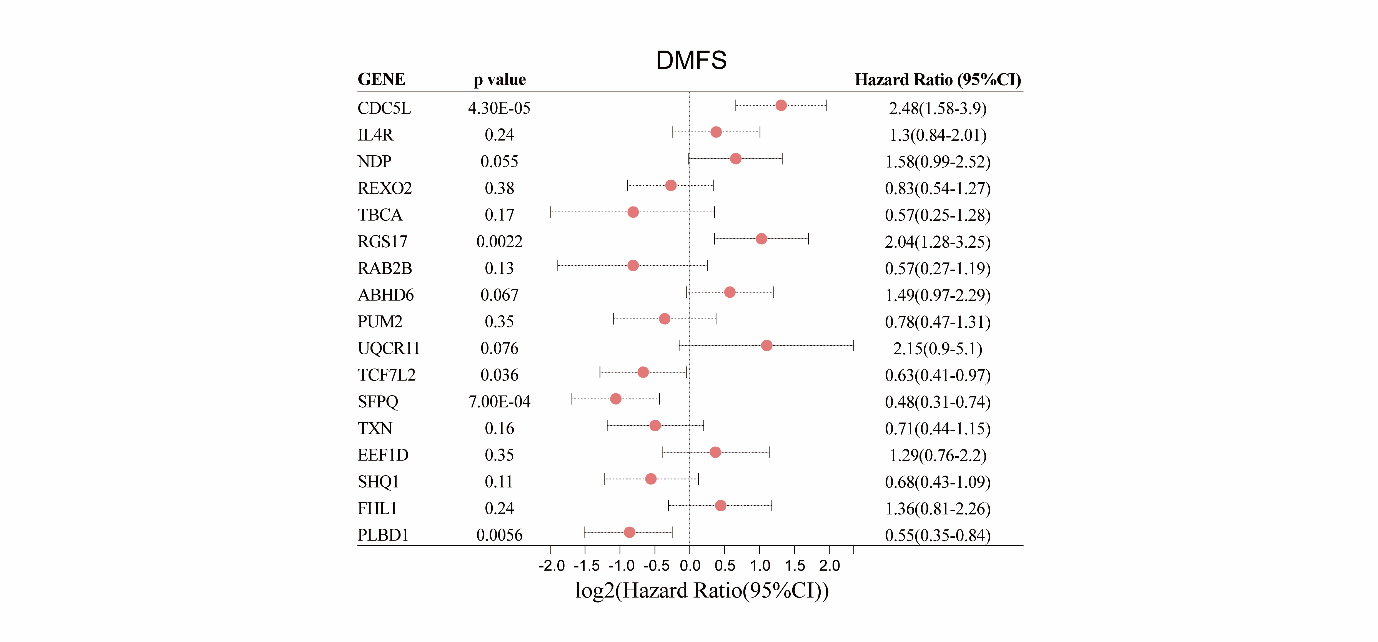


## Figure S1. TNBC prognostic forest plot of the 17 stem-related genes

Distant metastasis free survival (DMFS) of 17 stem-related genes based on the TCGA database.


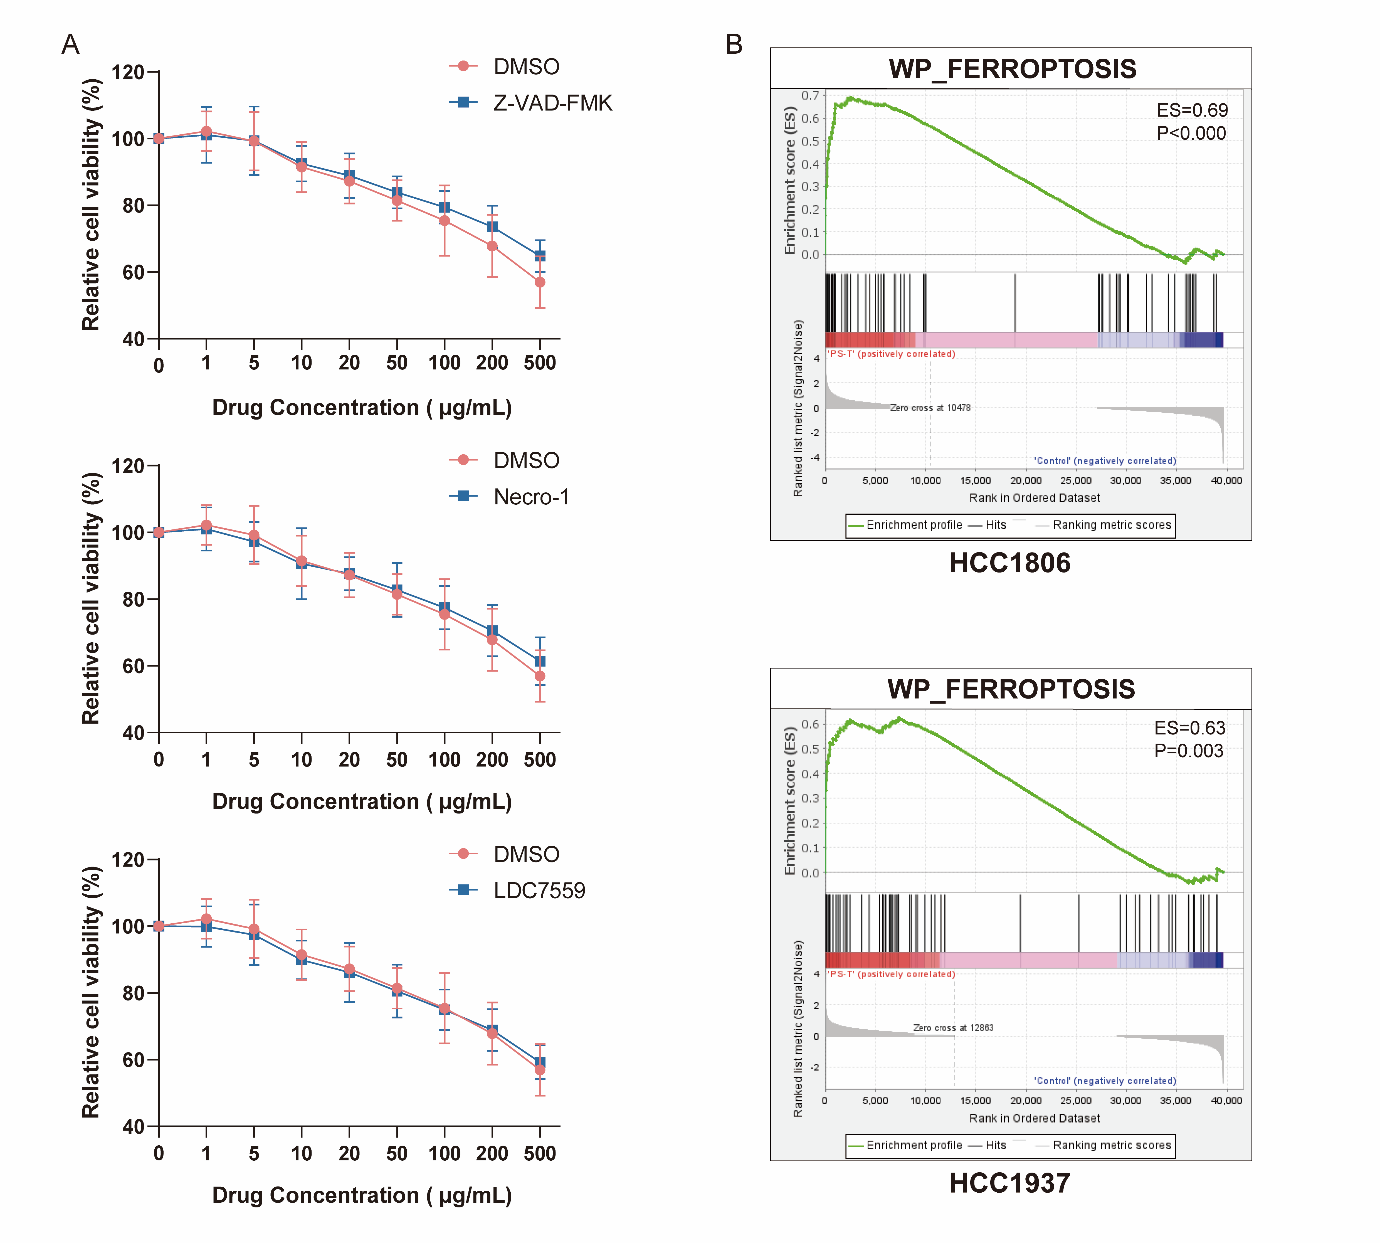


## Figure S2. PS-T induces ferroptosis in TNBC cell lines

**(A)** ALDH+ MDA-MB-231 cells were flow-sorted and treated with different concentration of PS-T with or without Z-VAD-FMK (30 µM) (*up*), Necrostatin-1 (Necro-1, 20 µM) (*middle*), LDC7559 (5 µM) (*down*). Cell viability was measured by CCK-8 assays (n = 9). **(B)** GSEA result of HCC1806 (*up*) and HCC1937 cells (*down*) treated with or without PS-T using WP_FERROPTOSIS gene set.


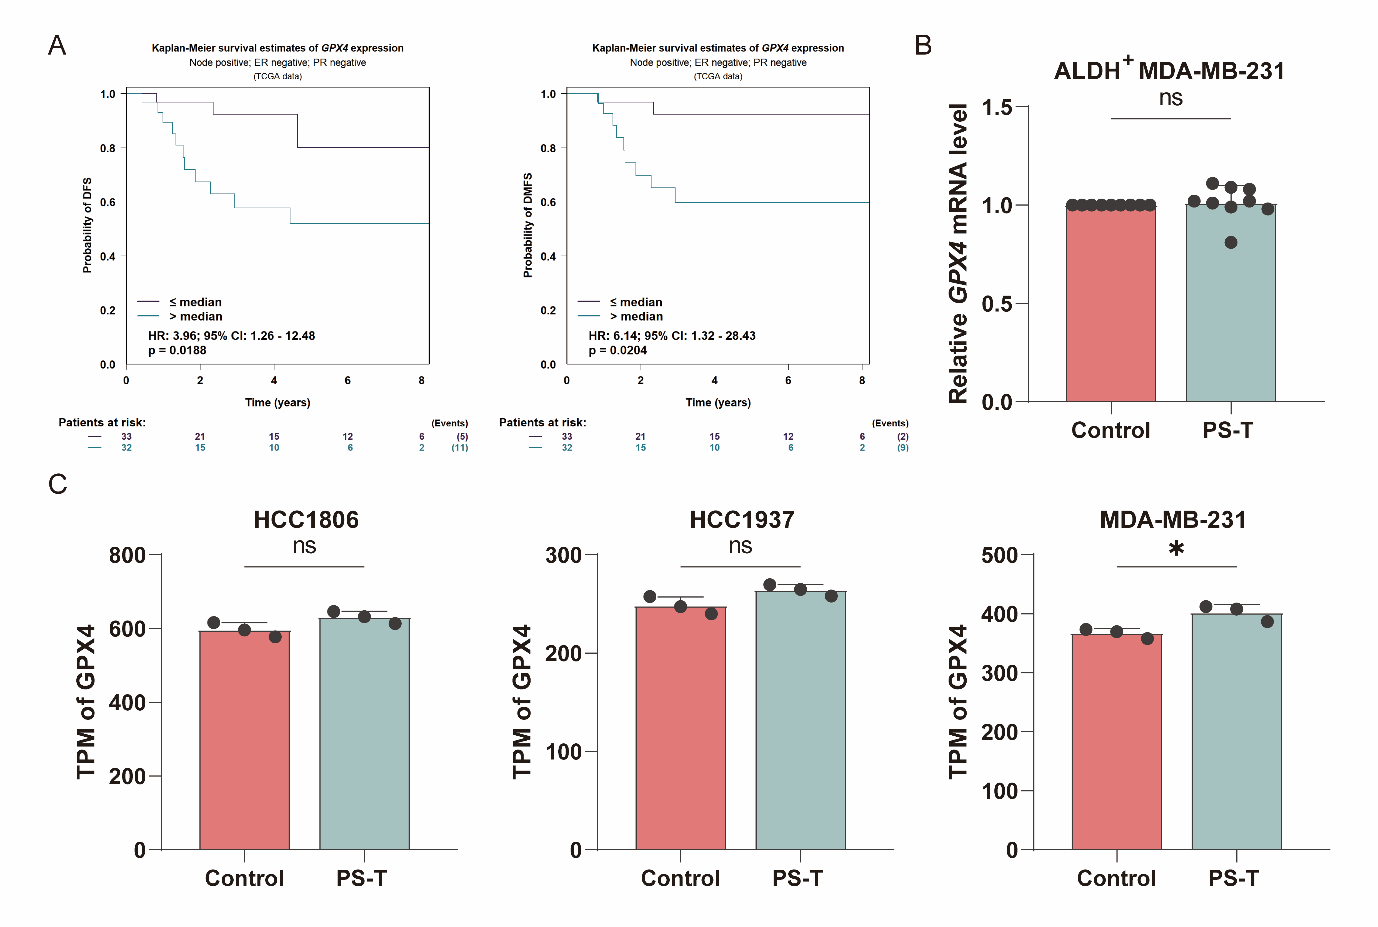


## Figure S3. The effect of PS-T on GPX4 expression

**(A)** Correlation of GPX4 expression with DFS (*left*) and DMFS (*right*) in TNBC patients from TCGA database. **(B)** The GPX4 mRNA level in ALDH+ MDA-MB-231 cells was assesed by quantitative PCR (n = 9). **(C)** Transcriptome sequencing was performed to measure the TPM of GPX4 mRNA levels in the HCC1937 (*left*), HCC1806 (*middle*), and MDA-MB-231 cells (*right*) treated with or without PS-T (n = 3). (mean ± standard deviation; ns, not significant).
